# Supplementary material for: Promoting parenting strategies to improve tooth brushing in children: design of a non-randomised cluster-controlled trial
Source: Springer Nature journal article supplement (doi:10.1186/s12903-019-0902-6), 2019-09-06
Supplement: MOESM2 [file 17146786]

## Appendix 2 - Questionnaire 'Shine!' study (English)

1. ID Code \_\_\_\_\_

2. Child's date of birth \_\_\_\_day / \_\_\_\_ month / \_\_\_\_year

3. Child's gender:  male  female

### 4. What is your relation to the child?

- |                                              |                                            |
|----------------------------------------------|--------------------------------------------|
| <input type="checkbox"/> biological mother   | <input type="checkbox"/> biological father |
| <input type="checkbox"/> adoptive mother     | <input type="checkbox"/> adoptive father   |
| <input type="checkbox"/> stepmother          | <input type="checkbox"/> stepfather        |
| <input type="checkbox"/> foster mother       | <input type="checkbox"/> foster father     |
| <input type="checkbox"/> grandmother         | <input type="checkbox"/> grandfather       |
| <input type="checkbox"/> other, namely _____ |                                            |

## TOOTH BRUSHING

### 1. How often are your child's teeth usually brushed?

- not every day
- once a day
- twice a day
- three times a day

### 2. How old was your child when he/she first started having his/her teeth brushed?

- Under 1 year
- 1 year – under 2 years
- 2 year – under 3 years
- 3 years or over
- Cannot remember

### 3. Who brushes you child's teeth?

- only a parent / caregiver (please go to question 6)
- only the child
- both parent / caregiver and the child

### 4. Do you check whether your child has brushed his/her teeth?

- always
- often
- sometimes
- never

**5. Do you re-brush your child's teeth?**

- always
- often
- sometimes
- never

**6. Is your child allowed to skip tooth brushing, for example when he/she is tired or doesn't feel like brushing?**

- always
- often
- sometimes
- never

**7. Does your child use toothpaste?**

- yes, always
- yes, sometimes
- no (please go to question 8)

**What brand of toothpaste does your child usually use?**

Name of brand \_\_\_\_\_

**8. "How confident are you about making sure your child's teeth are brushed before bedtime when you are...?"**

|                                                                                     | very confident           | fairly confident         | not so confident         | not at all confident     |
|-------------------------------------------------------------------------------------|--------------------------|--------------------------|--------------------------|--------------------------|
| a. under a lot of stress                                                            | <input type="checkbox"/> | <input type="checkbox"/> | <input type="checkbox"/> | <input type="checkbox"/> |
| b. depressed                                                                        | <input type="checkbox"/> | <input type="checkbox"/> | <input type="checkbox"/> | <input type="checkbox"/> |
| c. anxious                                                                          | <input type="checkbox"/> | <input type="checkbox"/> | <input type="checkbox"/> | <input type="checkbox"/> |
| d. feeling like you don't have the time (too busy)                                  | <input type="checkbox"/> | <input type="checkbox"/> | <input type="checkbox"/> | <input type="checkbox"/> |
| e. tired                                                                            | <input type="checkbox"/> | <input type="checkbox"/> | <input type="checkbox"/> | <input type="checkbox"/> |
| f. worrying about other things in your life                                         | <input type="checkbox"/> | <input type="checkbox"/> | <input type="checkbox"/> | <input type="checkbox"/> |
| g. bothered by your child crying                                                    | <input type="checkbox"/> | <input type="checkbox"/> | <input type="checkbox"/> | <input type="checkbox"/> |
| h. bothered because your child doesn't stay still when you want him or her to brush | <input type="checkbox"/> | <input type="checkbox"/> | <input type="checkbox"/> | <input type="checkbox"/> |
| i. told by your child that he or she does not feel like brushing right now          | <input type="checkbox"/> | <input type="checkbox"/> | <input type="checkbox"/> | <input type="checkbox"/> |

FOODS AND DRINKS

**1. How many days a week does your child have breakfast?**

- 1 day a week
- 2 days a week
- 3 days a week
- 4 days a week
- 5 days a week
- 6 days a week
- 7 days a week

2. Many children take a drink to bed with them either to have before they go to sleep, or during the night. How often does your child have something to drink in bed or during the night?

- always
- often
- sometimes
- never (please go to question 4)

3. When your child has a drink in bed or during the night, what does he/she usually have?  
(Please tick as many boxes as necessary)

- |                                                            |                                              |
|------------------------------------------------------------|----------------------------------------------|
| <input type="checkbox"/> fruit juice                       | <input type="checkbox"/> water               |
| <input type="checkbox"/> lemonade                          | <input type="checkbox"/> tea                 |
| <input type="checkbox"/> milk                              | <input type="checkbox"/> fizzy drinks        |
| <input type="checkbox"/> milk with sugar or honey          | <input type="checkbox"/> other, namely _____ |
| <input type="checkbox"/> milk drinks (e.g. chocolate milk) |                                              |

4. Thinking about food, how often does your child eat in bed or during the night?

- always
- often
- sometimes
- never (please go to question 6)

5. When your child has something to eat when going to sleep or during the night, what does he/she usually have?(Please tick as many boxes as necessary)

- |                                                               |                                              |
|---------------------------------------------------------------|----------------------------------------------|
| <input type="checkbox"/> sweet biscuits                       | <input type="checkbox"/> fruit               |
| <input type="checkbox"/> savoury / plain biscuits or crackers | <input type="checkbox"/> sweets or chocolate |
| <input type="checkbox"/> cakes                                | <input type="checkbox"/> sandwiches          |
| <input type="checkbox"/> crisps or savoury snacks             | <input type="checkbox"/> other, namely _____ |
| <input type="checkbox"/> cakes                                |                                              |

6. How often does your child eat something between meals (for example, fruit or biscuits)?

- never
- less than once a day
- 1-2 times a day
- 3-5 times a day
- 6-10 times a day
- more than 10 times a day

7. How often does your child drink something between meals (for example, fruit juice, milk; water and tea without sugar not included)?

- never
- less than once a day
- 1-2 times a day
- 3-5 times a day
- 6-10 times a day

more than 10 times a day

**BACKGROUND INFORMATION**

1. **What's the child's country of birth** \_\_\_\_\_

2. **What's the country of birth of the mother of the child?** \_\_\_\_\_

3. **What's the country of birth of the father of the child?** \_\_\_\_\_

4. **What language is usually spoken at home?** \_\_\_\_\_

5. **What is the highest completed level of education of the mother?**

- no education
- elementary school
- secondary school (VBO, VMBO, MAVO)
- secondary school (HAVO, VWO)
- lower vocational education (LBO/MBO)
- higher vocational education (HBO)
- university
- I don't know (I am not the mother of the child)

6. **What is the postal code of the child's home address (first four numbers only)?**

\_\_\_\_\_

7. **How many children do you have?**

- 1 child
- 2 children
- 3 children
- 4 or more children

8. **Is this your first child, second child, etc?**

- first
- second
- third
- fourth or more

Please take the time to make sure you have answered all questions.

**Thank you very much for your help!**

## Appendix 2 – Vragenlijst Uitblinkers-onderzoek (Nederlands)

1. Naam kind \_\_\_\_\_

2. Geboortedatum kind \_\_\_\_dag / \_\_\_\_ maand / \_\_\_\_ jaar

3. Geslacht kind:  jongen  meisje

### 4. Wat is uw relatie tot het kind?

- |                                                 |                                            |
|-------------------------------------------------|--------------------------------------------|
| <input type="checkbox"/> biologische moeder     | <input type="checkbox"/> biologische vader |
| <input type="checkbox"/> adoptief moeder        | <input type="checkbox"/> adoptief vader    |
| <input type="checkbox"/> stiefmoeder            | <input type="checkbox"/> biologische vader |
| <input type="checkbox"/> pleegmoeder            | <input type="checkbox"/> pleegvader        |
| <input type="checkbox"/> grootmoeder            | <input type="checkbox"/> grootvader        |
| <input type="checkbox"/> anders, namelijk _____ |                                            |

## TANDEN POETSEN

### 1. Hoe vaak worden de tanden van uw kind gepeetst?

- |                                                              |                                                              |
|--------------------------------------------------------------|--------------------------------------------------------------|
| <input type="checkbox"/> niet iedere dag                     | <input type="checkbox"/> altijd 2 keer per dag               |
| <input type="checkbox"/> altijd 1 keer per dag               | <input type="checkbox"/> meestal 2 keer, soms 3 keer per dag |
| <input type="checkbox"/> meestal 1 keer, soms 2 keer per dag | <input type="checkbox"/> meestal 3 keer, soms 2 keer per dag |
| <input type="checkbox"/> meestal 2 keer, soms 1 keer per dag | <input type="checkbox"/> altijd 3 of meer keer per dag       |

### 2. Hoe oud was uw kind toen zijn/haar tanden voor het eerst werden gepeetst?

- minder dan 1 jaar
- 1 tot 2 jaar
- 2 tot 3 jaar
- Kan ik mij niet herinneren

### 3. Wie peetst de tanden van uw kind?

- alleen de ouder / verzorger (ga door naar vraag 6)
- alleen het kind
- ouder / verzorger en kind

### 4. Controleert u of uw kind zijn/haar tanden heeft gepeetst?

- altijd
- meestal
- af en toe
- nooit

**5. Poetst u de tanden van uw kind na?**

- altijd
- meestal
- af en toe
- nooit

**6. Mag uw kind het tandenpoetsen wel eens overslaan (bijvoorbeeld als hij/zij moe is of geen zin heeft)?**

- altijd
- meestal
- af en toe
- nooit

**7. Gebruikt uw kind tandpasta bij het poetsen?**

- ja, altijd
- ja, soms
- nee

**Zo ja, welk merk tandpasta koopt u meestal voor het gebruik van uw kind?**

Merknaam .....

**8. "Hoe zeker bent u ervan dat het u lukt om voor het slapen gaan de tanden van uw kind te poetsen, als u...?"**

|                                                               | Heel zeker               | Redelijk zeker           | Niet zo zeker            | Helemaal niet zeker      |
|---------------------------------------------------------------|--------------------------|--------------------------|--------------------------|--------------------------|
| a. Stress heeft                                               | <input type="checkbox"/> | <input type="checkbox"/> | <input type="checkbox"/> | <input type="checkbox"/> |
| b. Zich depressief voelt                                      | <input type="checkbox"/> | <input type="checkbox"/> | <input type="checkbox"/> | <input type="checkbox"/> |
| c. Gespannen voelt                                            | <input type="checkbox"/> | <input type="checkbox"/> | <input type="checkbox"/> | <input type="checkbox"/> |
| d. Geen tijd heeft (te druk)                                  | <input type="checkbox"/> | <input type="checkbox"/> | <input type="checkbox"/> | <input type="checkbox"/> |
| e. Moe bent                                                   | <input type="checkbox"/> | <input type="checkbox"/> | <input type="checkbox"/> | <input type="checkbox"/> |
| f. Zich druk maakt om andere dingen in het leven              | <input type="checkbox"/> | <input type="checkbox"/> | <input type="checkbox"/> | <input type="checkbox"/> |
| g. Last heeft van uw huilend kind                             | <input type="checkbox"/> | <input type="checkbox"/> | <input type="checkbox"/> | <input type="checkbox"/> |
| h. Last heeft dat uw kind niet meewerkt met het poetsen       | <input type="checkbox"/> | <input type="checkbox"/> | <input type="checkbox"/> | <input type="checkbox"/> |
| i. Hoort van uw kind dat hij/zij geen zin heeft om te poetsen | <input type="checkbox"/> | <input type="checkbox"/> | <input type="checkbox"/> | <input type="checkbox"/> |

VOEDING

**1. Hoeveel dagen per week ontbijt uw kind?**

- 1 dag per week
- 2 dagen week
- 3 dagen per week
- 4 dagen per week
- 5 dagen per week
- 6 dagen per week
- 7 dagen per week

**2. Veel kinderen nemen wat te drinken mee naar bed, zodat zij iets kunnen drinken tijdens de nacht. Hoe vaak neemt uw kind iets te drinken in bed?**

- nooit
- soms
- meestal
- altijd

**3. Wat drinkt uw kind meestal wanneer hij/zij iets te drinken heeft in bed?  
(kruis alle hokjes aan die van toepassing zijn)**

- |                                                                        |                                                 |
|------------------------------------------------------------------------|-------------------------------------------------|
| <input type="checkbox"/> vruchtensap                                   | <input type="checkbox"/> water                  |
| <input type="checkbox"/> vruchtenlimonade                              | <input type="checkbox"/> thee                   |
| <input type="checkbox"/> melk                                          | <input type="checkbox"/> frisdrank              |
| <input type="checkbox"/> melk met suiker of honing                     | <input type="checkbox"/> anders, namelijk ..... |
| <input type="checkbox"/> melk bevattende dranken (bijv. chocolademelk) |                                                 |

**4. Hoe vaak eet uw kind iets in bed gedurende de nacht?**

- iedere dag
- de meeste dagen
- af en toe
- nooit

**5. Wat eet uw kind meestal als hij/zij iets te eten heeft in bed?  
(kruis alle hokjes aan die van toepassing zijn)**

- |                                             |                                                  |
|---------------------------------------------|--------------------------------------------------|
| <input type="checkbox"/> koekjes            | <input type="checkbox"/> snoep of chocolade      |
| <input type="checkbox"/> fruit              | <input type="checkbox"/> chips of hartige snacks |
| <input type="checkbox"/> boterhammen (zoet) | <input type="checkbox"/> anders, namelijk .....  |
| <input type="checkbox"/> cakes              |                                                  |

**6. Hoe vaak per dag eet uw kind iets tussen de maaltijden door (bijvoorbeeld snoep, een koek, fruit, etc)?**

- nooit
- minder dan 1 keer
- 1-2 keer
- 3-5 keer
- 6-10 keer
- meer dan 10 keer

**7. Hoe vaak per dag drinkt uw kind iets tussen de maaltijden door (bijv. fruitsap, wicky, frisdrank, siroop, thee met suiker. Water en thee zonder suiker niet meegerekend)?**

- nooit
- minder dan 1 keer
- 1-2 keer
- 3-5 keer
- 6-10 keer
- meer dan 10 keer

## ACHTERGRONDINFORMATIE

1. In welk land is het kind geboren? \_\_\_\_\_

2. Wat is het geboorteland van de moeder van het kind? \_\_\_\_\_

3. Wat is het geboorteland van de vader van het kind? \_\_\_\_\_

4. Welke taal wordt er thuis gesproken? \_\_\_\_\_

5. Wat is de hoogste opleiding die de moeder van het kind heeft afgemaakt?

- geen onderwijs gehad
- basisschool
- middelbare school (VBO, VMBO, MAVO)
- middelbare school (HAVO, VWO)
- Lager/middelbaar beroepsonderwijs (LBO/MBO)
- Hoger beroepsonderwijs (HBO)
- Universiteit
- weet ik niet (Ik ben niet zelf de moeder van het kind)

6. Wat is de postcode van uw thuisadres (de eerste 4 cijfers)? \_\_\_\_\_

7. Hoeveel kinderen heeft u?

- 1 kind
- 2 kinderen
- 3 kinderen
- 4 of meer kinderen

8. Uw hoeveelste kind is dit?

- eerste
- tweede
- derde
- vierde of meer

Neemt u alstublieft nog even kort de tijd om er zeker van te zijn dat u alle vragen heeft ingevuld.

**Hartelijk bedankt voor uw hulp!**
