# Supplementary material for: Promoting parenting strategies to improve tooth brushing in children: design of a non-randomised cluster-controlled trial
Source: Springer Nature journal article supplement (doi:10.1186/s12903-019-0902-6), 2019-09-06
Supplement: MOESM4 [file 17146786]

## Appendix 4 – Questionnaire for dental therapists (English)

### GENERAL

1. Name \_\_\_\_\_
2. What is your age? \_\_\_\_\_ years
3. Do you work in a...? (please tick multiple answers if necessary)
  - Group practice
  - Solo practice
4. How many years have you been working as a dental therapist?\_\_ \_\_\_\_\_ years
5. What kind of educational training have you received to become a dental therapist
  - Vocational training for dental therapists (MBO)
  - I am trained in the dental practice

### THE SHINE! STUDY

6. How many patients have you included for the Shine! study? \_\_\_\_\_ patients
7. On average, how much time did it take you to have a conversation with a parent, following the Shine! method? \_\_\_\_\_minutes

Below are a number of statements about the ‘Shine!’ method. Please indicate to what extent you agree with the statements. We are interested in your opinion and experiences, so there are no good or wrong answers.

| Feasibility                                                                                         | Fully agree              | Agree                    | Neutral                  | Disagree                 | Fully disagree           | N.A.                     |
|-----------------------------------------------------------------------------------------------------|--------------------------|--------------------------|--------------------------|--------------------------|--------------------------|--------------------------|
| 8. I am using a different style of counselling since I have received training in the Shine! method. | <input type="checkbox"/> | <input type="checkbox"/> | <input type="checkbox"/> | <input type="checkbox"/> | <input type="checkbox"/> | <input type="checkbox"/> |
| 9. The Shine! method takes too much time.                                                           | <input type="checkbox"/> | <input type="checkbox"/> | <input type="checkbox"/> | <input type="checkbox"/> | <input type="checkbox"/> | <input type="checkbox"/> |
| 10. I am asking more open-ended questions since I received training in the Shine! method.           | <input type="checkbox"/> | <input type="checkbox"/> | <input type="checkbox"/> | <input type="checkbox"/> | <input type="checkbox"/> | <input type="checkbox"/> |
| 11. Having a conversation following the Shine! method feels unnatural to me.                        | <input type="checkbox"/> | <input type="checkbox"/> | <input type="checkbox"/> | <input type="checkbox"/> | <input type="checkbox"/> | <input type="checkbox"/> |
| 12. I already applied many conversation techniques of the Shine! method before the training.        | <input type="checkbox"/> | <input type="checkbox"/> | <input type="checkbox"/> | <input type="checkbox"/> | <input type="checkbox"/> | <input type="checkbox"/> |
| 13. Conversations with parents are more positive when using the Shine! method.                      | <input type="checkbox"/> | <input type="checkbox"/> | <input type="checkbox"/> | <input type="checkbox"/> | <input type="checkbox"/> | <input type="checkbox"/> |
| 14. I find it difficult to ask parents about their personal home situation during the interview.    | <input type="checkbox"/> | <input type="checkbox"/> | <input type="checkbox"/> | <input type="checkbox"/> | <input type="checkbox"/> | <input type="checkbox"/> |
| 15. The Shine! method is innovative.                                                                | <input type="checkbox"/> | <input type="checkbox"/> | <input type="checkbox"/> | <input type="checkbox"/> | <input type="checkbox"/> | <input type="checkbox"/> |
| <b>Cards with barriers and the script</b>                                                           | Fully agree              | Agree                    | Neutral                  | Disagree                 | Fully disagree           | N.A.                     |



33. The Shine! method is too complex to implement in dental practice.
34. I would like to continue using the Shine! method after the study has been completed.

35. Apart from the 9 barriers on the cards, did parents experience any other barriers to tooth brushing? If so, what barriers were mentioned?

---

---

---

---

36. Do you have recommendations on how the Shine! method can be improved?

---

---

---

---

**Thank you very much for your help!**

## Appendix 4 – Vragenlijst voor preventie-assistenten (Nederlands)

### ALGEMEEN

1. Naam \_\_\_\_\_
2. Leeftijd \_\_\_\_\_ jaar
3. In wat voor praktijk werkt u? (meerdere antwoorden mogelijk)
  - Groepspraktijk
  - Solopraktijk
4. Hoe lang bent u al werkzaam als preventie-assistent? \_\_\_\_\_ jaar
5. Wat voor opleiding tot preventie-assistent heeft u gehad?
  - MBO opleiding voor preventie-assistent
  - Opgeleid in een tandartspraktijk

### HET UITBLINKERS ONDERZOEK

6. Bij hoeveel patiënten heeft u de Uitblinkers-methode toegepast? \_\_\_\_\_ patiënten
7. Hoeveel tijd nam een gesprek volgens de Uitblinkers-methode gemiddeld in beslag? \_\_\_\_\_ minuten

Hieronder staan enkele stellingen over de Uitblinkers-methode. Wilt u aangeven in hoeverre u het met deze stellingen eens bent? Het gaat om uw mening en ervaringen; er zijn dus geen goede of foute antwoorden!

| <b>Uitvoerbaarheid</b>                                                                   | <b>Volledig eens</b>     | <b>Mee eens</b>          | <b>Neutraal</b>          | <b>Oneens</b>            | <b>Volledig oneens</b>   | <b>N.v.t.</b>            |
|------------------------------------------------------------------------------------------|--------------------------|--------------------------|--------------------------|--------------------------|--------------------------|--------------------------|
| 8. Door de Uitblinkers-training ben ik op een andere manier gaan voorlichten             | <input type="checkbox"/> | <input type="checkbox"/> | <input type="checkbox"/> | <input type="checkbox"/> | <input type="checkbox"/> | <input type="checkbox"/> |
| 9. Het toepassen van Uitblinkers-methode kost te veel tijd                               | <input type="checkbox"/> | <input type="checkbox"/> | <input type="checkbox"/> | <input type="checkbox"/> | <input type="checkbox"/> | <input type="checkbox"/> |
| 10. Ik stel meer open vragen aan ouders sinds de Uitblinkers-training                    | <input type="checkbox"/> | <input type="checkbox"/> | <input type="checkbox"/> | <input type="checkbox"/> | <input type="checkbox"/> | <input type="checkbox"/> |
| 11. Het voeren van een gesprek volgens de Uitblinkers-methode voelt (nog) onnatuurlijk   | <input type="checkbox"/> | <input type="checkbox"/> | <input type="checkbox"/> | <input type="checkbox"/> | <input type="checkbox"/> | <input type="checkbox"/> |
| 12. Veel gesprekstechnieken van de Uitblinkers-methode paste ik hiervoor al toe          | <input type="checkbox"/> | <input type="checkbox"/> | <input type="checkbox"/> | <input type="checkbox"/> | <input type="checkbox"/> | <input type="checkbox"/> |
| 13. Gesprekken met ouders verlopen positiever met de Uitblinkers-methode                 | <input type="checkbox"/> | <input type="checkbox"/> | <input type="checkbox"/> | <input type="checkbox"/> | <input type="checkbox"/> | <input type="checkbox"/> |
| 14. Ik vind het moeilijk om bij ouders door te vragen naar de persoonlijke thuissituatie | <input type="checkbox"/> | <input type="checkbox"/> | <input type="checkbox"/> | <input type="checkbox"/> | <input type="checkbox"/> | <input type="checkbox"/> |
| 15. De Uitblinkers-methode is vernieuwend                                                | <input type="checkbox"/> | <input type="checkbox"/> | <input type="checkbox"/> | <input type="checkbox"/> | <input type="checkbox"/> | <input type="checkbox"/> |
| <b>Kaarten met barrières en script</b>                                                   | <b>Volledig</b>          | <b>Mee</b>               | <b>Neutraal</b>          | <b>Oneens</b>            | <b>Volledig</b>          | <b>N.v.t.</b>            |



|                                                                                                  |                          |                          |                          |                          |                          |                          |
|--------------------------------------------------------------------------------------------------|--------------------------|--------------------------|--------------------------|--------------------------|--------------------------|--------------------------|
| 32. Door te vragen naar barrières bij poetsen, kan ik beter afgestemde adviezen aan ouders geven | <input type="checkbox"/> | <input type="checkbox"/> | <input type="checkbox"/> | <input type="checkbox"/> | <input type="checkbox"/> | <input type="checkbox"/> |
| 33. De Uitblinkers-methode is te complex voor de praktijk                                        | <input type="checkbox"/> | <input type="checkbox"/> | <input type="checkbox"/> | <input type="checkbox"/> | <input type="checkbox"/> | <input type="checkbox"/> |
| 34. Ik wil de Uitblinkers-methode na het onderzoek blijven toepassen in de praktijk              | <input type="checkbox"/> | <input type="checkbox"/> | <input type="checkbox"/> | <input type="checkbox"/> | <input type="checkbox"/> | <input type="checkbox"/> |

35. Zijn er nog andere barrières bij poetsen door ouders genoemd?

---



---



---

36. Heeft u aanbevelingen hoe we de Uitblinkers-methode kunnen verbeteren?

---



---



---



---

**Veel dank voor uw inzet en voor het invullen van deze vragenlijst!**
